# Supplementary material
Source: Research Square preprint supplement (doi:10.21203/rs.3.rs-9528695/v1)
Supplement: Supplementary file 1 [file 26330958847fd0f344896bd5.docx]

**Semi-structured Interview Outline for Dynamic Burdens and Dilemmas of Temporary Ileostomy in Rectal Cancer Patients**

**I. Basis for Outline Design**

Based on the clinical diagnosis and treatment pathway of temporary ileostomy in rectal cancer patients and the rules of patients’ physical and mental adaptation, this outline focuses on the dynamic process of four stages ("Decision-making - Tension - Adaptation - Termination"), integrates the dual perspectives of "patients’ subjective experiences" and "healthcare providers’ clinical practices", and balances the requirements of qualitative research for "in-depth exploration of individual perceptions" and "academic standardization". It is applicable to data collection in relevant qualitative studies in this field and can provide references for subsequent clinical interventions and optimization of medical services.

**II. Interview Outline for Patients**

**(I) Decision-making Stage: Cognitive Construction and Right to Autonomous Choice**

**Core Objective**: Explore patients’ decision-making logic for accepting ostomy, biases in information acquisition, and perceptions of autonomy, with a focus on "the influence of medical authority" and "the initial role of the 'temporary' label".

1. Receipt of Ostomy Recommendation and Initial Cognition

(1) What was your initial reaction when the doctor first mentioned "temporary ileostomy"? At that time, did you understand "temporary" as a "clear time commitment", "vague recovery expectation", or something else?

(2) Did the doctor inform you of the expected duration of ostomy retention (e.g., 3-6 months)? Did you regard this timeframe as a "non-negotiable deadline"? If not informed, what was your psychological expectation of the duration at that time?

(3) After hearing the recommendation, was your initial attitude "immediate acceptance", "hesitation", or "explicit refusal"? Did you change your attitude due to persuasion from doctors or family members? Please provide specific examples of the persuasive reasons.

1. Value Judgment and Risk Perception of Ostomy

(1) What do you perceive as the core function of the ostomy? Did you hold the perception that "having an ostomy = more thorough tumor treatment" or "not having an ostomy = high probability of anastomotic leakage"? What was the source of this perception (doctor’s information, personal assumption, others’ experiences)?

(2) Did the doctor fully inform you of potential nursing challenges (e.g., leakage, skin irritation) or complications (e.g., irreversible ostomy)? If not, how did you feel when you encountered these issues for the first time after surgery?

(3) If the doctor had clearly informed you that "approximately 10% of patients cannot undergo ostomy reversal on schedule due to complications", would your decision have changed? Would you prioritize the "90% success probability" or the "10% risk"?

1. Decision-making Process and Perception of Autonomy

(1) What were the core reasons for your final decision to accept the ostomy (multiple choices allowed: surgical safety, ostomy reversibility, family persuasion, doctor’s recommendation, desire to preserve the anus; please supplement if there are other unlisted reasons)? Please rate the importance of each selected reason on a scale of 1-10 and explain the rationale.

(2) Do you believe you had sufficient voice in the decision to "undergo or not undergo the ostomy"? Was there a sense of helplessness of "having no choice but to accept" (e.g., worrying that the doctor would disregard your opinions, family members strongly opposing non-ostomy options)?

(3) Did you discuss alternative options to the ostomy with the doctor? Did the doctor fully address your concerns (e.g., "What is the actual risk of not having an ostomy")?

**(II) Tension Stage: Nursing Adaptation and Psychological Stress**

**Core Objective**: Capture patients’ dilemmas in nursing practice, emotional fluctuations, and coping strategies in the early postoperative period, with a focus on the "gap between expectations and reality".

1. Nursing Practice Dilemmas and Barriers

(1) After actually caring for the ostomy, what challenges did you not anticipate before surgery (e.g., leakage management, frequency of ostomy bag changes)? Please describe your most frustrating nursing experience (time, scenario, specific issue).

(2) Did family members face obstacles in providing care (e.g., fear of operation, difficulty in learning for elderly family members)? Could the nursing guidance received during hospitalization (e.g., nurse demonstrations) be smoothly transitioned to home care (e.g., the caregiver during hospitalization was different from the long-term caregiver)?

(3) When encountering nursing difficulties, could you obtain timely assistance (e.g., contacting healthcare providers, consulting fellow patients)? What type of assistance did you need most?

1. Psychological and Emotional Changes and Perception of Regret

(1) Did the ostomy cause you to experience negative emotions (e.g., shame, anger, helplessness)? In what scenarios did these emotions typically arise (e.g., during leakage, when others mentioned the ostomy)?

(2) Have you ever regretted accepting the ostomy? If yes, what event triggered this regret (e.g., complications, social avoidance); if no, how did you convince yourself "not to regret" (e.g., comparing with permanent ostomy)?

(3) Faced with the difficulties brought by the ostomy, what reasons did you use to persuade yourself to persist? Could the perception that "the ostomy is temporary" alleviate your negative emotions? Did you deliberately avoid counting the "number of days with the ostomy" for fear of emotional breakdown if it exceeded the expected duration?

1. Life Changes and Stress Relief

(1) Among the changes brought by the ostomy, which aspect was the most difficult for you to accept (e.g., body image changes, dietary restrictions, sleep disturbances)?

(2) What specific changes did the ostomy bring to your living habits (e.g., dietary taboos, sleeping posture, travel rhythm, social frequency)? Did you deliberately avoid topics related to the "ostomy" or engage in abnormal behaviors due to inner distress?

(3) What methods did you use to relieve stress (e.g., comfort from healthcare providers, communication with fellow patients, self-regulation)? Which method was the most effective?

**(III) Adaptation Stage: Stable Ostomy Carriage and Deadline Anxiety**

**Core Objective**: Analyze patients’ long-term adaptation to the ostomy, changes in social roles, and anxiety caused by "expectation of reversal", with a focus on the "double-edged sword effect of the 'temporary' label".

1. Daily Life Adaptation and Physical Perception

(1) As the duration of ostomy carriage lengthened, did your attitude towards the ostomy change (e.g., from a "foreign body" to "part of the body")? What practical impacts did ostomy care have on your daily life? How did you perceive the burden and necessity of this daily care? Could you complete the care independently, or did you have to rely on family assistance?

(2) Did the ostomy affect your social roles (e.g., work, family care responsibilities, social interactions)? Did you postpone plans (e.g., travel, gatherings) and wait until after the reversal to implement them?

(3) Did you deliberately avoid certain activities (e.g., sports, dining out)? What were your concerns (e.g., leakage, others discovering the ostomy)?

1. Expectation of Reversal and Evolution of Anxiety

(1) Did your attention to the "reversal time" change over time (e.g., not anxious in the early stage, counting days every day in the later stage)? Please describe this dynamic process.

(2) If the ostomy retention time exceeded the initial duration informed by the doctor, what was your mindset (e.g., anxiety, suspicion of "irreversible ostomy", proactively inquiring with the doctor)?

(3) Have you experienced ostomy-related complications (e.g., obstruction, skin infection)? Did these conditions increase your urgency to "undergo reversal as soon as possible"?

1. Burden Perception and Social Withdrawal

(1) Compared with physical discomfort (e.g., pain, abnormal defecation), which was more unbearable: the psychological suffering of waiting for reversal? Please explain the reasons.

(2) Did you reduce your social activities (e.g., refusing gatherings, avoiding long trips)? What was the core reason (e.g., inconvenient care, sense of shame)? Did you feel a sense of indebtedness to your family due to the ostomy? Did family members deliberately conceal their fatigue from providing care? How did this "mutual emotional concealment" affect your mindset?

(3) What kind of support did you need most during this period (e.g., psychological counseling, nursing guidance, financial assistance)? Was this support fulfilled?

**(IV) Termination Stage: Reflection and Meaning Reconstruction Before Reversal**

**Core Objective**: Trace patients’ overall evaluation of the ostomy experience, reconstruction of "the meaning of suffering", and suggestions for medical services, with a focus on "psychological changes before reversal".

1. Expectation and Worry Before Reversal

(1) What was your first feeling when you learned that the reversal surgery was scheduled (e.g., relief, worry about surgical risks)?

(2) If admission was delayed due to reasons such as bed shortage, did you feel "each day felt like a year"? What impact did this delay have on your psychology? Have you ever had the thought of "wanting to undergo reversal in advance, even willing to reduce or suspend chemotherapy"?

(3) Were you worried about the reversal surgery (e.g., pain, failure) or postoperative anal function (e.g., incontinence, defecation difficulties)?

1. Overall Evaluation of the Ostomy Experience

(1) If you were to rate the "physical pain" and "psychological suffering" of the ostomy experience on a scale of 1-10, what scores would you assign to each? What is the rationale? Did you feel this period was "unbearable to recall" and were unwilling to actively think about it?

(2) Did you perceive this experience as an "unavoidable cost of treatment" or an "avoidable torment"? When you saw others successfully treated without an ostomy, did you experience self-doubt?

(3) Looking back on the entire ostomy experience, what supported you the most to persist? Did you believe that "enduring the pain of the ostomy should lead to better treatment outcomes"? If a permanent ostomy had been necessary due to treatment needs, how would you have accepted it? After becoming more proficient in care, did you gain a sense of accomplishment that made it easier to accept the ostomy?

1. Suggestions and Reflections

(1) If you could go back to before the decision-making process, what additional information would you have wanted the doctor to share (e.g., detailed care instructions, complication probabilities)? How would you rate the doctor’s attention to medical safety, your physical and mental burden, and your right to choice when recommending the ostomy? Was any aspect overlooked?

(2) What suggestions would you give to fellow patients facing the choice of ostomy (e.g., key considerations during decision-making, care skills)?

(3) What aspects of ostomy management do you hope the medical industry will improve (e.g., increasing psychological counseling services, enhancing follow-up care)?

**III. Interview Outline for Healthcare Providers**

**(I) Cognition of Temporary Ileostomy**

1. Medical Attitude

(1) Do you agree with the routine performance of temporary ileostomy? What is your rationale (e.g., clinical data, patient prognosis, departmental experience)?

(2) What do you consider to be the advantages and disadvantages of temporary ileostomy? What factors (e.g., individual patient conditions, surgical risks) make you more certain about whether to select this surgical plan?

(3) If you or a family member were a patient, would you choose temporary ileostomy? What factors would you prioritize during decision-making?

1. Selection Criteria

(1) Are there clear criteria for you and your department to select candidates for temporary ileostomy? Do these criteria include factors such as patient age, tumor stage, anastomotic location, and comorbidities? Please provide examples to illustrate the decision-making logic for typical cases.

(2) Are you aware of any current explicit guidelines for performing temporary ileostomy? If yes, what are the main reasons for you to adhere to or deviate from them; if no, what impact do you believe the lack of unified guidelines has on clinical decision-making (e.g., ostomy selection criteria)?

(3) What factors do you need to consider when formulating a surgical plan? Do you believe non-medical factors (e.g., departmental pressure, patient family demands) influence the decision to perform temporary ileostomy?

**(II) Attention to Patients**

1. Medical Decision-making Power

(1) When recommending ostomy, do you prefer a "recommendation-led" or "shared decision-making" model? How do you assess patients’ decision-making willingness and capacity for autonomous choice (e.g., educational level, psychological state, family support)?

(2) Do you use "ostomy reversibility" as the core reason to persuade patients to accept the ostomy? If a patient questions "reversibility" (e.g., worrying about delayed reversal), how would you respond?

1. Medical Support

(1) Are you aware of the psychological burden experienced by patients throughout the process from surgical plan selection to reversal surgery (e.g., decision-making anxiety, care pressure, deadline-related worry)? In clinical decision-making, how do you balance patients’ psychological anxiety and surgical safety? When there is a potential conflict between the two, what is your decision-making priority?

(2) Have you observed that patients and their families face multiple care barriers in the early stage of ostomy, such as technical barriers (inability to operate), psychological barriers (fear of providing care), and transition barriers (disconnection between hospital and home care)? What specific coping measures have you and your department implemented for these barriers?

(3) Do you pay attention to potential psychological issues in patients during care (e.g., shame, anxiety, helplessness)? How would you provide counseling or referral (e.g., contacting the psychology department, organizing peer support groups)? What specific comfort measures do you take to address patients’ psychological pressure?

(4) Does your department conduct multidisciplinary collaboration with the psychology department, nutrition department, ostomy therapists, etc., to meet patients’ care and psychological needs? What are the advantages or obstacles in this collaboration?
